# Supplementary material for: Sight, Scent, and Sound: Leveraging the Landscape of Fear for Effective Wildlife Management
Source: Research Square preprint supplement (doi:10.21203/rs.3.rs-6955116/v1), 2025-08-21
Supplement: Supplementary file 1 [file 207c5d165763bf5414441856.docx]

**Sound, Scent, and Sight: Leveraging the Landscape of Fear for Effective Wildlife Management**

*Author: Juan Ignacio Ramirez, Natalie Heroiza*

**Supplementary information**

**S1. Search criteria**

“(artificial or simulate or fake or mock or synthetic or imitation or human or man-­made) and (deer or cervid or ungulate) and (sound or audio or vocalization or bark or growl or grunt roar or howl or sight or visual or aural or model or poster or billboard or smell or olfactory or scent or aroma or trace) and (cue or clue or signal or display or playback or hint or trial) and (response or behaviour or behavior or vigilance or visitation or flee or flight or escape or fight or forage or walk or browse or graze or damage or habituate)”.

**S2. Selection of articles and exclusion criteria. *This figure and text is published in Ramirez et al., (2024).**

Criteria and selection process of literature for the quantitative analysis. Research scope: original peer-reviewed scientific publications in English on the behavioural responses of deer to experimentally introduced large predator cues (aural, olfactory, visual) across all ecosystems.

*Abstract and titles that refer to research that fell outside the research scope were excluded. The most common reasons for exclusion were species not belonging to the Cervidae family and literature review without original results.

**Content of articles that described research that fell outside the research scope were excluded. The most common reasons for exclusion were individual deer responding to other individuals, to other non-predator animals, to chemical repellents and to naturally occurring cues. A few articles were omitted because they were not peer reviewed.

***Additional articles within our research scope were retrieved by screening the reference list of the records included in the quantitative analysis and assessing for their content. These records were not initially identified probably because they missed a keyword from our search criteria.

**S3. Data source. List of references from which data was extracted.**

Allan, B. F., Varns, T. S., & Chasea, J. M. (2010). Fear of parasites: lone star ticks increase giving-up densities in white-tailed deer. Israel Journal of Ecology and Evolution, 56(3–4), 313–324.

Andelt, W. F., Baker, D. L., & Burnham, K. P. (1992). Relative preference of captive cow elk for repellent-treated diets. The Journal of Wildlife Management, 56(1), 164–173. https://doi.org/10.2307/3808805

Andelt, W. F., Burnham, K. P., & Manning, J. A. (1991). Relative effectiveness of repellents for reducing mule deer damage. The Journal of Wildlife Management, 55(2), 341–347. https://doi.org/10.2307/3809161

Belant, J. L., Seamans, T. W., & Tyson, L. A. (1998). Predator urines as chemical barriers to white-tailed deer. Proceedings of the Eighteenth Vertebrate Pest Conference, 359–362.

Berger, J. (2007). Carnivore repatriation and holarctic prey: narrowing the deficit in ecological effectiveness. Conservation Biology, 21(4), 1105–1116. https://doi.org/10.1111/j.1523-1739.2007.00729.x

Berger, J., Swenson, J. E., & Persson, I.-L. (2001). Recolonizing carnivores and naïve prey: conservation lessons from pleistocene extinctions. Science, 291(5506), 1036–1039. https://doi.org/10.1126/science.1056466

Bhardwaj, M., Lodnert, D., Olsson, M., Winsvold, A., Eilertsen, S. M., Kjellander, P., & Seiler, A. (2022). Inducing fear using acoustic stimuli—A behavioral experiment on moose (Alces alces) in Sweden. Ecology and Evolution, 12(11), e9492. https://doi.org/10.1002/ece3.9492

Chabot, D., Gagnon, P., & Dixon, E. A. (1996). Effect of predator odors on heart rate and metabolic rate of wapiti (Cervus elaphus canadensis). Journal of Chemical Ecology, 22, 839–868. https://doi.org/10.1007/BF02033590

Chamaillé-Jammes, S., Malcuit, H., Le Saout, S., & Martin, J.-L. (2014). Innate threat-sensitive foraging: black-tailed deer remain more fearful of wolf than of the less dangerous black bear even after 100 years of wolf absence. Oecologia, 174(4), 1151–1158. https://doi.org/10.1007/s00442-013-2843-0

Conover, M. R. (1984). Effectiveness of repellents in reducing deer damage in nurseries. Wildlife Society Bulletin4, 12(4), 399–404.

Conover, M. R., & Kania, G. S. (1987). Effectiveness of human hair, BGR, and a mixture of blood meal and peppercorns in reducing deer damage to young apple trees. Third Eastern Wildlife Damage Control Conference, 97–101.

Crawford, D. A., Conner, L. M., Clinchy, M., Zanette, L. Y., & Cherry, M. J. (2022). Prey tells, large herbivores fear the human ‘super predator.’ Oecologia, 198, 91–98. https://doi.org/10.1007/s00442-021-05080-w

Eccard, J. A., Meißner, J. K., & Heurich, M. (2017). European roe deer increase vigilance when faced with immediate predation risk by eurasian lynx. Ethology, 123(1), 30–40. https://doi.org/10.1111/eth.12420

Elmeros, M., Winbladh, J. K., Andersen, P. N., Madsen, A. B., & Christensen, J. T. (2011). Effectiveness of odour repellents on red deer (Cervus elaphus) and roe deer (Capreolus capreolus): A field test. European Journal of Wildlife Research, 57(6), 1223–1226. https://doi.org/10.1007/s10344-011-0517-y

Espmark, Y., & Langvatn, R. (1985). Development and habituation of cardiac and behavioral responses in young red deer calves (Cervus elaphus) exposed to alarm stimuli. Journal of Mammalogy, 66(4), 702–711. https://doi.org/10.2307/1380796

Harris, M. T., Palmer, W. L., & George, J. L. (1983). Preliminary screening of white-tailed deer repellents. The Journal of Wildlife Management, 47(2), 516–519. https://doi.org/10.2307/3808526

Hettena, A. M., Munoz, N., & Blumstein, D. T. (2014). Prey responses to predator’s sounds: a review and empirical study. Ethology, 120(5), 427–452. https://doi.org/10.1111/eth.12219

Kuijper, D. P. J., Verwijmeren, M., Churski, M., Zbyryt, A., Schmidt, K., Jędrzejewska, B., & Smit, C. (2014). What cues do ungulates use to assess predation risk in dense temperate forests? PLoS ONE, 9(1), e84607. https://doi.org/10.1371/journal.pone.0084607

LaGory, K. E. (1987). The influence of habitat and group characteristics on the alarm and flight response of white-tailed deer. Animal Behaviour, 35(1), 20–25. https://doi.org/10.1016/S0003-3472(87)80206-3

Li, C., Yang, X., Ding, Y., Zhang, L., Fang, H., Tang, S., & Jiang, Z. (2011). Do Père David’s deer lose memories of their ancestral predators? PLoS ONE, 6(8), e23623. https://doi.org/10.1371/journal.pone.0023623

Melchiors, M. A., & Leslie, C. A. (1985). Effectiveness of predator fecal odors as black-tailed deer repellents. The Journal of Wildlife Management, 49(2), 358–362. https://doi.org/10.2307/3801531

Milunas, M. C., Rhoads, A. F., & Mason, J. R. (1994). Effectiveness of odour repellents for protecting ornamental shrubs from browsing by white-tailed deer. Crop Protection, 13(5), 393–397. https://doi.org/10.1016/0261-2194(94)90056-6

Moen, A. N., DellaFera, M. A., Hiller, A. L., & Buxton, B. A. (1978). Heart rates of white-tailed deer fawns in response to recorded wolf howls. Canadian Journal of Zoology, 56(5), 1207–1210. https://doi.org/10.1139/z78-165

Müller-Schwarze, D. (1972). Responses of young black-tailed deer to predator odors. Journal of Mammalogy, 53(2), 393–394. https://doi.org/10.2307/1379188

Nunley, M. C. (1981). Response of Deer to Human Blood Odor. American Anthropologist, 83(3), 630–634.

Osada, K., Miyazono, S., & Kashiwayanagi, M. (2014). Pyrazine analogs are active components of wolf urine that induce avoidance and fear-related behaviors in deer. Frontiers in Behavioral Neuroscience, 8, 276. https://doi.org/10.3389/fnbeh.2014.00276

Padié, S., Morellet, N., Cargnelutti, B., Hewison, A. J. M., Martin, J.-L., & Chamaillé-Jammes, S. (2015). Time to leave? Immediate response of roe deer to experimental disturbances using playbacks. European Journal of Wildlife Researc, 61(6), 871–879. https://doi.org/10.1007/s10344-015-0964-y

Palmer, M. S., Portales-Reyes, C., Potter, C., Mech, L. D., & Isbell, F. (2021). Behaviorally-mediated trophic cascade attenuated by prey use of risky places at safe times. Oecologia, 195, 235–248. https://doi.org/10.1007/s00442-020-04816-4

Pyare, S., & Berger, J. (2003). Beyond demography and delisting: ecological recovery for Yellowstone’s grizzly bears and wolves. Biological Conservation, 113(1), 63–73. https://doi.org/10.1016/S0006-3207(02)00350-6

Sahlén, E., Noell, S., DePerno, C. S., Kindberg, J., Spong, G., & Cromsigt, J. P. G. M. (2016). Phantoms of the forest: legacy risk effects of a regionally extinct large carnivore. Ecology and Evolution, 6(3), 791–799. https://doi.org/10.1002/ece3.1866

Seamans, T., Blackwell, B., & Linnell, K. (2016). Use of predator hair to enhance perceived risk to white-tailed deer in a foraging context. Human-Wildlife Interactions, 10(2), 300–311.

Seamans, T. W., Blackwell, B. F., & Cepek, J. D. (2002). Coyote hair as an area repellent for white-tailed deer. International Journal of Pest Management, 48(4), 301–306. https://doi.org/10.1080/09670870210149853

Stankowich, T., & Coss, R. G. (2007). The re-emergence of felid camouflage with the decay of predator recognition in deer under relaxed selection. Proceedings of the Royal Society B: Biological Sciences, 274(1607), 175–182. https://doi.org/10.1098/rspb.2006.3716

Sullivan, T. P., Nordstrom, L. O., & Sullivan, D. S. (1985). Use of predator odors as repellents to reduce feeding damage by herbivores. Journal of Chemical Ecology, 11, 921–935. https://doi.org/10.1007/BF01012078

Swihart, R. K., Pignatello, J. J., & Mattina, M. J. I. (1991). Aversive responses of white-tailed deer,Odocoileus virginianus, to predator urines. Journal of Chemical Ecology, 17, 767–777. https://doi.org/10.1007/BF00994199

van Ginkel, H. A. L., Smit, C., & Kuijper, D. P. J. (2019). Behavioral response of naïve and non-naïve deer to wolf urine. PLoS ONE, 14(11), e0223248. https://doi.org/10.1371/journal.pone.0223248

Weterings, M. J. A., Meister, N., Fey, K., Jansen, P. A., van Langevelde, F., & Kuipers, H. J. (2022). Context-dependent responses of naïve ungulates to wolf-sound playback in a human-dominated landscape. Animal Behaviour, 185, 9–20. https://doi.org/10.1016/j.anbehav.2021.12.013

Widén, A., Clinchy, M., Felton, A. M., Hofmeester, T. R., Kuijper, D. P. J., Singh, N. J., Widemo, F., Zanette, L. Y., & Cromsigt, J. P. G. M. (2022). Playbacks of predator vocalizations reduce crop damage by ungulates. Agriculture, Ecosystems & Environment, 328, 107853. https://doi.org/10.1016/j.agee.2022.107853

Wikenros, C., Kuijper, D. P. J., Behnke, R., & Schmidt, K. (2015). Behavioural responses of ungulates to indirect cues of an ambush predator. Behaviour, 152(7–8), 1019–1040. https://doi.org/10.1163/1568539X-00003266

**S4. Behavioural responses of deer to predator cues extracted from the global literature search. *This figure and text is published in Ramirez et al., (2024).**

**Behavioural responses of deer to visual cues from predators.**

| Visual | | | | | | |
| --- | --- | --- | --- | --- | --- | --- |
| Study | Country | Predator | Cue type | Prey | Response type | Response |
| (Espmark & Langvatn, 1985) | Norway | Human | Waving plastic basin | Red deer | Heart rate, flee | No, no |
|  |  | Human | Body shape | Red deer | Heart rate, behaviour | Yes, yes |
| (Li et al., 2011) | China | Dog | Photograph model | Pere David's deer | Foraging, vigilance, Flee | No, yes, no |
|  |  | Leopard | Photograph model | Pere David's deer | Foraging, vigilance, Flee | No, yes, no |
|  |  | Tiger | Photograph model | Pere David's deer | Foraging, vigilance, Flee | No, yes, no |
|  |  | Lion | Photograph model | Pere David's deer | Foraging, vigilance, Flee | No, yes, no |
|  |  | Brown bear | Photograph model | Pere David's deer | Foraging, vigilance, Flee | No, yes, no |
|  |  | Wolf | Photograph model | Pere David's deer | Foraging, vigilance, Flee | No, yes, no |
| (Padié et al., 2015) | France | Human | Body shape | Roe deer | Flee | Yes |
| (LaGory, 1987) | USA | Human | Body shape | White-tailed deer | Flee, vigilance | Yes, yes |
| (Stankowich & Coss, 2007) | USA | Cougar | Photograph model | Black -tailed deer | Snorting, stamping, alarm walking | Yes, yes, no |
|  |  | Leopard | Photograph model | Black -tailed deer | Snorting, stamping, alarm walking | Yes, no, no |
|  |  | Tiger | Photograph model | Black -tailed deer | Snorting, stamping, alarm walking | Yes, yes, yes |

**Behavioural responses of deer to olfactory cues from predators.**

| Olfactory | | | | | | |
| --- | --- | --- | --- | --- | --- | --- |
| Study | Country | Predator | Cue type | Prey | Response type | Response |
| (Allan et al., 2010) | USA | Dog | Urine | White-tailed deer | GUD, Visitation | No, no |
| (Berger et al., 2001) | USA, Norway, Sweden | Tiger | Feces | Moose | Vigilance, abandonment | Yes,yes |
|  |  | Coyote | Urine | Moose | Vigilance, abandonment | Yes,yes |
|  |  | Wolf | Urine | Moose | Vigilance, abandonment | Yes,yes |
|  |  | Black bear | Feces | Moose | Vigilance, abandonment | Yes,yes |
|  |  | Grizzly bear | Feces | Moose | Vigilance, abandonment | Yes,yes |
|  |  | Human | Urine | Moose | Vigilance, abandonment | Yes, no |
| (Chabot et al., 1996) | Canada | Cougar | Feces | Elk | Heart rate, V0max | Yes, yes |
|  |  | Cougar | Feces extraction | Elk | Heart rate, V0max | No, no |
|  |  | Dog | Feces | Elk | Heart rate, V0max | Yes, yes |
|  |  | Dog | Urine | Elk | Heart rate, V0max | Yes, yes |
|  |  | Coyote | Feces | Elk | Heart rate, V0max | No, no |
|  |  | Coyote | Dead body | Elk | Heart rate, V0max | No, yes |
|  |  | Fox | Urine | Elk | Heart rate, V0max | No, no |
|  |  | Wolf | Feces | Elk | Heart rate, V0max | Yes, yes |
| (Eccard et al., 2017) | Germany | Lynx | Urine | Roe deer | Visitation, vigilance | Yes, yes |
| (Espmark & Langvatn, 1985) | Norway | Fox | Feces | Red deer | Heart rate, behaviour | No, no |
| (Palmer et al., 2021) | USA | Wolf | Urine | White-tailed deer | Visitation rate, foraging, vigilance, diel activity | No, no, no, yes |
| (Harris et al., 1983) | USA | Human | Hair | White-tailed deer | Food choice | No |
| (Nunley, 1981) | USA | Human | Blood | White-tailed deer | Food choice | Yes |
|  |  | Human | Urine | White-tailed deer | Food choice | No |
| (Conover, 1984) | USA | Human | Hair | White-tailed deer | Browsing damage | No |
| (Sullivan et al., 1985) | Canada | Cougar | Feces | Black -tailed deer | Food consumption | Yes |
|  |  | Coyote | Feces | Black -tailed deer | Food consumption | Yes |
|  |  | Wolf | Feces | Black -tailed deer | Food consumption | Yes |
|  |  | Lynx-Bobcat | Feces | Black -tailed deer | Food consumption | Yes |
|  |  | Jaguar | Feces | Black -tailed deer | Food consumption | Yes |
|  |  | Coyote | Urine | Black -tailed deer | Food consumption | Yes |
|  |  | Wolf | Urine | Black -tailed deer | Food consumption | Yes |
|  |  | Lynx | Urine | Black -tailed deer | Food consumption | Yes |
|  |  | Bobcat | Urine | Black -tailed deer | Food consumption | Yes |
|  |  | Fox | Urine | Black -tailed deer | Food consumption | Yes |
|  |  | Wolverine | Urine | Black -tailed deer | Food consumption | Yes |
| (Melchiors & Leslie, 1985) | USA | Coyote | Feces | Black -tailed deer | Food consumption | Yes |
|  |  | Wolf | Feces | Black -tailed deer | Food consumption | Yes |
|  |  | Bobcat | Feces | Black -tailed deer | Food consumption | Yes |
|  |  | Cougar | Feces | Black -tailed deer | Food consumption | Yes |
| (Swihart et al., 1991) | USA | Bobcat | Urine | White-tailed deer | Browsing damage | Yes |
|  |  | Coyote | Urine | White-tailed deer | Browsing damage | Yes |
|  |  | Human | Urine | White-tailed deer | Browsing damage | No |
| (Milunas et al., 1994) | USA | Human | Swet | White-tailed deer | Browsing damage | No |
| (Conover & Kania, 1987) | USA | Human | Hair | White-tailed deer | Browsing damage | Yes |
| (Kuijper et al., 2014) | Poland | Wolf | Feces | Red deer | Visit span, foraging, walking, vigilance, sniffing | No, yes, no, yes, yes |
| (Chamaillé-Jammes et al., 2014) | Canada | Wolf | Urine | Black -tailed deer | Visitation rate, first visit, food consumption, sniffing, vigilance, visit span | No, no, yes, yes, no, yes |
|  |  | Black bear | Urine | Black -tailed deer | Visitation rate, first visit, food consumption, sniffing, vigilance, visit span | No, no, no, yes, no, no |
|  |  | Human | Cologne | Black -tailed deer | Visitation rate, first visit, food consumption, sniffing, vigilance, visit span | No, no, no, no, no, no |
| (Osada et al., 2014) | Japan | Wolf | Urine | Sika deer | Visitation rate, visit span, tail-flag | Yes, yes, yes |
| (Müller-Schwarze, 1972) | USA | Coyote | Feces | Black -tailed deer | Food choice | Yes |
|  |  | Cougar | Feces | Black -tailed deer | Food choice | Yes |
|  |  | Lion | Feces | Black -tailed deer | Food choice | Yes |
|  |  | Snow leopard | Feces | Black -tailed deer | Food choice | Yes |
|  |  | Tiger | Feces | Black -tailed deer | Food choice | Yes |
| (Andelt et al., 1992) | USA | Coyote | Urine | Elk | Food consumption, browsing damage | Yes, yes |
| (Andelt et al., 1991) | USA | Coyote | Urine | Mule deer | Food consumption, browsing damage | Yes, yes |
| (Pyare & Berger, 2003) | USA | Wolf | Urine | Moose | Vigilance, flee | Yes, yes |
|  |  | Grizzly bear | Feces | Moose | Vigilance, flee | Yes, yes |
|  |  | Human | Urine | Moose | Vigilance, flee | Yes, no |
| (Wikenros et al., 2015) | Poland | Lynx | Feces | Roe deer | Vigilance, visitation, visit span, behaviour | No, no, yes, no |
|  |  | Lynx | Feces | Red deer | Vigilance, visitation, visit span, behaviour | No, no, yes, yes |
| (Sahlén et al., 2016) | Sweden | Brown bear | Hair | Fallow deer | Visitation | Yes |
|  |  | Brown bear | Hair | Roe deer | Visitation | No |
| (T. Seamans et al., 2016) | USA | Coyote | Hair | White-tailed deer | Alert behaviour, food consumption | Yes, yes |
|  |  | Bobcat | Hair | White-tailed deer | Alert behaviour, food consumption | Yes, no |
|  |  | Black bear | Hair | White-tailed deer | Alert behaviour, food consumption | Yes, no |
| (T. W. Seamans et al., 2002) | USA | Coyote | Hair | White-tailed deer | Visitation, food consumption, trail use | Yes, yes, no |
| (Belant et al., 1998) | USA | Coyote | Urine | White-tailed deer | Visitation, food consumption, trail use | Yes, yes, no |
|  |  | Bobcat | Urine | White-tailed deer | Visitation, food consumption, trail use | Yes, yes, no |
| (van Ginkel et al., 2019) | Netherlands, Poland | Wolf | Urine | Red deer | Visitation, visit span, behaviours | No, no, no |
| (Elmeros et al., 2011) | Denmark | Wolf | Urine | Roe deer | Visitation | No |
|  |  | Wolf | Urine | Red deer | Visitation | No |

**Behavioural responses of deer to acoustic cues from predators.**

| Acoustic | | | | | | |
| --- | --- | --- | --- | --- | --- | --- |
| Study | Country | Predator | Cue type | Prey | Response type | Response |
| (Crawford et al., 2022) | USA | Human | Playback | White-tailed deer | Flee, visitation | Yes, yes |
|  |  | Coyote | Playback | White-tailed deer | Flee, visitation | Yes, yes |
|  |  | Wolf | Playback | White-tailed deer | Flee, visitation | Yes, yes |
|  |  | Cougar | Playback | White-tailed deer | Flee, visitation | Yes, yes |
| (Berger et al., 2001) | USA, Norway, Sweden | Tiger | Playback | Moose | Vigilance | Yes |
|  |  | Coyote | Playback | Moose | Vigilance | Yes |
|  |  | Wolf | Playback | Moose | Vigilance | Yes |
| (Espmark & Langvatn, 1985) | Norway | Dog | Playback | Red deer | Heart rate | Yes, yes |
| (Hettena et al., 2014) | USA | Cougar | Playback | Mule deer | Vigilance | No |
|  |  | Coyote | Playback | Mule deer | Vigilance | Yes |
|  |  | Wolf | Playback | Mule deer | Vigilance | Yes |
| (Li et al., 2011) | China | Dog | Playback | Pere David's deer | Foraging, Vigilance, Flee | Yes, yes, no |
|  |  | Tiger | Playback | Pere David's deer | Foraging, Vigilance, Flee | Yes, yes, no |
|  |  | Lion | Playback | Pere David's deer | Foraging, Vigilance, Flee | Yes, yes, no |
|  |  | Wolf | Playback | Pere David's deer | Foraging, Vigilance, Flee | Yes, yes, no |
| (Moen et al., 1978) | USA | Wolf | Playback | White-tailed deer | Heart rate | Yes |
| (Padié et al., 2015) | France | Dog | Playback | Roe deer | Flee | Yes |
| (Berger, 2007) | Russia, US, Canada, Norway, Greenland | Wolf | Playback | Elk | Vigilance, grouping, flee | Yes, yes, yes |
|  |  | Wolf | Playback | Caribou | Vigilance, grouping, flee | Yes, yes, yes |
|  |  | Wolf | Playback | Moose | Vigilance, flee | Yes, yes |
|  |  | Tiger | Playback | Elk | Vigilance, grouping, flee | Yes, yes, yes |
|  |  | Tiger | Playback | Caribou | Vigilance | No |
|  |  | Tiger | Playback | Moose | Vigilance | Yes |
| (Weterings et al., 2022) | Netherlands | Wolf | Playback | Red, roe, fallow deer | Visitation, grouping | Yes, no |
| (Widén et al., 2022) | Sweden | Wolf, dog, human | Playback | Roe deer | Patch use | Yes |
|  |  | Wolf, dog, human | Playback | Fallow deer | Patch use | Yes |
|  |  | Wolf, dog, human | Playback | Moose, red, roe, fallow deer | Crop damage | Yes |
|  |  | Dog | Playback | Moose, red, roe, fallow deer | Fear duration | No |
|  |  | Wolf | Playback | Moose, red, roe, fallow deer | Fear duration | Yes |
|  |  | Human | Playback | Moose, red, roe, fallow deer | Fear duration | Yes |
| (Bhardwaj et al., 2022) | Sweden | Human | Playback | Moose | Leaving, vigilant, Feeding, time out of frame, Time between events | Yes, yes, yes, yes, yes |
|  |  | Dog | Playback | Moose | Leaving, vigilant, Feeding, time out of frame, Time between events | Yes, yes, yes, yes, yes |
